# Supplementary material for: MethylRAD-Seq Technology Reveals DNA Methylation Charac-Teristics of Apostichopus japonicus of Different Ages
Source: Preprints.org preprint supplement (doi:10.20944/preprints202310.1105.v1), 2023-10-18
Supplement: Supplementary file 1 [file supplementary]

## Sheet: Sheet1
Related Differential Methylation Gene Annotation Information.
Site	Gene	Group	ID	Term	Pval	Enrichment_score	Up/Down
CG	Aspartate aminotransferase	A VS B	ko00250	Alanine, aspartate and glutamate metabolism	0.000468	8.2034	Up
		AVS D	ko00250	Alanine, aspartate and glutamate metabolism	0.000224	9.94059	Up
	Succinate-semialdehyde dehydrogenase	A VS D	ko00250	Alanine, aspartate and glutamate metabolism	0.002298	5.34779	Up
		B VS D	ko00250	Alanine, aspartate and glutamate metabolism	2.87e-06	12.2456	Up
	Isocitrate dehydrogenase	A VS D	ko00480	Glutathione metabolism	0.001021	6.70995	Down
	H2AX	A VS D	ko04217	Necroptosis	0.0006	4.15362	Down
	Hsp90	A VS D	ko04217	Necroptosis	0.0006	4.15362	Up
	Pepn	A VS D	ko00480	Glutathione metabolism	0.001021	6.70995	Down
		B VS D	ko00480	Glutathione metabolism	2.65e-05	11.2604	Down
		C VS D	ko00480	Glutathione metabolism	2.65e-05	11.2604	Down
	CDC6	B VS C	ko04113	Meiosis - yeast	0.002665	5.17263	Down
		B VS D	ko04113	Meiosis - yeast	0.000359	8.82915	Down
CWG	Rasgap	A VS B	ko04360	Axon guidance	0.011753	3.39133	Down
		A VS C	ko04360	Axon guidance	0.009721	3.07667	Down
		B VS D	ko04360	Axon guidance	0.008958	3.66931	Up
		B VS D	ko04014	Ras signaling pathway	0.009583	3.59783	Up
		C VS D	ko04014	Ras signaling pathway	0.000773	4.57224	Up
	Slit1	A VS B	ko04360	Axon guidance	0.011753	3.39133	Up
		A VS C	ko04360	Axon guidance	0.009721	3.07667	Up
		A VS D	ko04360	Axon guidance	0.014353	3.19754	Up
	ILK	A VS C	ko04360	Axon guidance	0.009721	3.07667	Down
		A VS C	ko01522	Endocrine resistance	0.157491	1.04815	Down
		B VS C	ko01522	Endocrine resistance	0	1.17293	Down
	Mtor	B VS C	ko01522	Endocrine resistance	0	1.17293	Down
	Pka	A VS D	ko01522	Endocrine resistance	0.423746	1.00044	Down
		B VS D	ko04138	Autophagy - yeast	1.01e-05	13.6558	Down
		B VS D	ko04140	Autophagy - animal	0.000119	8.19346	Down
		C VS D	ko04062	Chemokine signaling pathway	0.00016	10.8466	Down
	Atg3	B VS D	ko04138	Autophagy - yeast	1.01e-05	13.6558	Down
		B VS D	ko04140	Autophagy - animal	0.000119	8.19346	Down
